# Supplementary material
Source: ML conference proceedings conference paper supplement (https://openaccess.thecvf.com/content/ICCV2021/html/Buhler_VariTex_Variational_Neural_ICCV_2021_paper.html)
Supplement: Supplementary file 1 [file Buhler_VariTex_Variational_Neural_ICCV_2021_supplemental.zip]

Archive with 2 entries (2 files):
- 9106-supp.pdf
- VariTex.mp4
